# Supplementary material for: Highly Sensitive and Selective Colorimetric Detection of Methylmercury Based on DNA Functionalized Gold Nanoparticles
Source: MDPI journal article supplement (doi:10.3390/s18082679), 2018-08-15
Supplement: s1 [file s1]

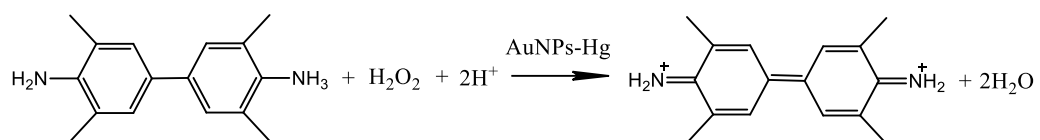

**Figure S1.** Chromogenic reaction of TMB

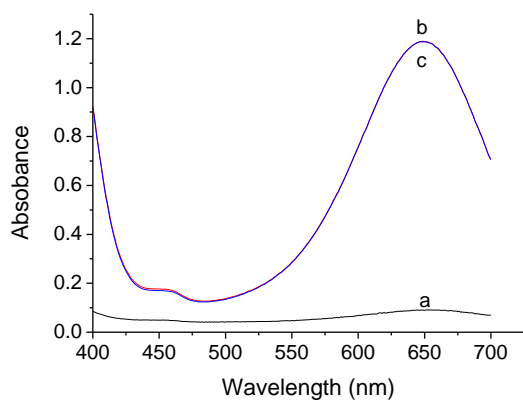

**Figure S2.** UV-vis spectra of citrate-stabilized AuNPs + TMB-H<sub>2</sub>O<sub>2</sub> reaction solution (a) before and after incubated with (b) CH<sub>3</sub>Hg<sup>+</sup> or (c) Hg<sup>2+</sup> deposition.
